# Supplementary material for: Identification of an immune subtype predicting survival risk and immune activity in hepatocellular carcinoma
Source: Aging (Albany NY). 2021 May 3;17(11):2859–74. doi: 10.18632/aging.202953 (PMC12705184; doi:10.18632/aging.202953)
Supplement: Supplementary Table 1 [file aging-17-11-202953-s002.xlsx]

## Sheet: Sheet1
Supplementary Table 1. The top 100 genes used for the pathway annotation.
Gene Symbol	Entrezid
CYP17A1	1586
FLNC	2318
FUT4	2526
ITGA6	3655
KRT6A	3853
KRT8	3856
SHC1	6464
VDAC1	7416
RGS20	8601
PLEK2	26499
LINGO2	158038
KRT6C	286887
PLK1	5347
VEGFC	7424
PKP2	5318
DLGAP5	9787
ECT2	1894
KRT6B	3854
LOXL2	4017
FOSL1	8061
CTSL	1514
KIF14	9928
SLC2A1	6513
CCNB1	891
HMMR	3161
ASPM	259266
CCNA2	890
HMGA1	3159
RRM2	6241
EXO1	9156
PKM	5315
TNS4	84951
EHBP1	23301
MAP4K4	9448
LAMC2	3918
PRC1	9055
ERLIN1	10613
ANP32B	10541
HJURP	55355
SMS	6611
KYNU	8942
NEIL3	55247
CDKN3	1033
TPX2	22974
TGIF1	7050
NEK2	4751
LAMB1	3912
MYO1E	4643
AKAP12	9590
OIP5	11339
PXN	5829
JAG1	182
LPGAT1	9926
FOXM1	2305
GNG7	2788
PFKP	5214
TPI1	7167
ADM	133
CDC25C	995
CHEK1	1111
SMOX	54498
PSMD2	5708
XCR1	2829
SLC16A1	6566
SPC25	57405
MKI67	4288
RHOF	54509
APOL1	8542
KIF4A	24137
SHCBP1	79801
CDK1	983
KIF11	3832
WDHD1	11169
SFTPB	6439
KIF18A	81930
XRCC6	2547
CENPF	1063
LAMC1	3915
TK1	7083
CACNA2D2	9254
NDC80	10403
PAICS	10606
DEPDC1	55635
PBK	55872
FCRL1	115350
STAP1	26228
PGAM1	5223
PMEPA1	56937
PABPC1	26986
KIF23	9493
H2AFZ	3015
LYAR	55646
CCNB2	9133
CENPE	1062
TNFRSF1A	7132
EIF4G1	1981
CEP55	55165
TACC3	10460
ANGPTL4	51129
TEAD4	7004
