# Supplementary material for: Identification of an immune subtype predicting survival risk and immune activity in hepatocellular carcinoma
Source: Aging (Albany NY). 2021 May 3;17(11):2859–74. doi: 10.18632/aging.202953 (PMC12705184; doi:10.18632/aging.202953)
Supplement: Supplementary Table 2 [file aging-17-11-202953-s003.xlsx]

## Sheet: Sheet1
Supplementary Table 2. Differential analyses results of the top 100 immune genes between low- and high-risk HCC subtypes in the TCGA cohort.
Gene Symbol	TCGA cohort
	P value	FDR
CYP17A1	0.512097	0.6656
FLNC	0.735104	0.827189
FUT4	0.575951	0.715673
ITGA6	0.812165	0.885876
KRT6A	0.487682	0.644871
KRT8	0.0826995	0.202479
SHC1	0.485737	0.643413
VDAC1	0.192722	0.344424
RGS20	0.00198107	0.0203363
PLEK2	0.000552827	0.00996603
LINGO2	0.0999341	0.225001
KRT6C	0.874368	0.927567
PLK1	0.945864	0.970192
VEGFC	0.933501	0.963193
PKP2	0.00276214	0.0255984
DLGAP5	0.760565	0.848353
ECT2	0.00355298	0.0293149
KRT6B	0.687853	0.795117
LOXL2	0.203953	0.359306
FOSL1	0.990636	0.995173
CTSL	0.119598	0.24786
KIF14	0.273146	0.430749
SLC2A1	0.00807361	0.0495332
CCNB1	0.0067184	0.0439872
HMMR	0.809651	0.884124
ASPM	6.8e-05	0.00308419
CCNA2	0.00417682	0.0328161
HMGA1	0.283974	0.443506
RRM2	0.0730307	0.185537
EXO1	0.010386	0.0570687
PKM	0.175375	0.323416
TNS4	0.0139151	0.067573
EHBP1	5.41e-05	0.00269604
MAP4K4	0.342065	0.503778
LAMC2	0.0414159	0.129462
PRC1	0.388178	0.549588
ERLIN1	0.0653057	0.172229
ANP32B	0.959289	0.977401
HJURP	0.822472	0.891576
SMS	0.109995	0.237803
KYNU	0.116051	0.244748
NEIL3	0.406604	0.568338
CDKN3	0.401646	0.562603
TPX2	0.230028	0.384647
TGIF1	0.171929	0.31901
NEK2	0.00630832	0.0425235
LAMB1	0.00287311	0.0258974
MYO1E	0.540933	0.689127
AKAP12	0.0780307	0.194118
OIP5	0.761579	0.848353
PXN	0.0227514	0.0901636
JAG1	0.458802	0.619265
LPGAT1	0.0307352	0.108104
FOXM1	0.506392	0.660467
GNG7	0.0259193	0.0969987
PFKP	0.0307183	0.108104
TPI1	0.0462478	0.138166
ADM	0.0145421	0.0698447
CDC25C	0.515618	0.668855
CHEK1	0.66448	0.780415
SMOX	0.851449	0.912743
PSMD2	0.333623	0.494702
XCR1	0.00800625	0.0492347
SLC16A1	0.000291589	0.00655951
SPC25	0.000388085	0.00785724
MKI67	0.562782	0.705017
RHOF	0.138137	0.273702
APOL1	0.0156317	0.07269
KIF4A	0.430115	0.590056
SHCBP1	0.469989	0.627924
CDK1	0.52623	0.67728
KIF11	0.0173165	0.0765999
WDHD1	0.895931	0.942106
SFTPB	0.118524	0.246257
KIF18A	0.766752	0.852594
XRCC6	0.052218	0.148948
CENPF	0.526582	0.677402
LAMC1	0.0368896	0.120913
TK1	0.421899	0.583214
CACNA2D2	0.000605599	0.0105182
NDC80	0.00103831	0.0138722
PAICS	0.0921122	0.214358
DEPDC1	0.0129689	0.0644039
PBK	0.00127684	0.0154415
FCRL1	0.0374551	0.122158
STAP1	0.174039	0.32198
PGAM1	0.0269205	0.0989591
PMEPA1	0.98988	0.994938
PABPC1	0.0315584	0.110331
KIF23	0.546872	0.694006
H2AFZ	0.0194649	0.0824984
LYAR	0.45036	0.610689
CCNB2	0.817678	0.889654
CENPE	0.017395	0.076818
TNFRSF1A	0.591074	0.728669
EIF4G1	0.915875	0.952047
CEP55	0.0390698	0.124796
TACC3	0.00298164	0.0266023
ANGPTL4	0.314901	0.475513
TEAD4	0.00627376	0.0424901
